# Supplementary material
Source: publisher figshare collection journal article supplement (https://acs.figshare.com/ndownloader/files/28376221)
Supplement: Supplementary file 1 [file 28376221]

# Supporting Information

## Anisotropically Functionalized Aptamer-DNA Nanostructures for Enhanced Cell Proliferation and Target-Specific Adhesion in 3D Cell Cultures

Keonwook Nam,<sup>†</sup> Byeol I Im,<sup>†</sup> Taehyung Kim, Young Min Kim, and Young Hoon Roh\*

Department of Biotechnology, College of Life Science and Biotechnology, Yonsei University, 50 Yonsei-ro, Seodaemun-gu, Seoul 03722, Republic of Korea.

### Corresponding Author

\*Email: yr36@yonsei.ac.kr

**Table S1.** Oligonucleotide sequences of Apt-X-DNA nanostructures.<sup>a</sup>

| Strand         | Sequence (5' – 3')                                                                                   | $\Delta G$ at 60°C<br>(kcal/mol) | T <sub>m</sub><br>(°C) |
|----------------|------------------------------------------------------------------------------------------------------|----------------------------------|------------------------|
| X1             | CGA CCG ATG AAT AGC GGT<br>CAG ATC CGT ACC TAC TCG                                                   | 0.4                              | 54.7                   |
| X2             | CGA GTA GGT ACG GAT CTG<br>CGT ATT GCG AAC GAC TCG                                                   | 0.87                             | 47.5                   |
| X3             | CGA GTC GTT CGC AAT ACG<br>GCT GTA CGT ATG GTC TCG                                                   | 1.29                             | 48.6                   |
| X4             | CGA GAC CAT ACG TAC AGC<br>ACC GCT ATT CAT CGG TCG                                                   | 0.59                             | 51.7                   |
| AS1411-T(n)-X1 | <u>GGT GGT GGT GGT TGT GGT GGT GGT GG</u><br>T(n) CGA CCG ATG AAT AGC GGT CAG ATC<br>CGT ACC TAC TCG | 0.4                              | 54.7                   |
| AS1411-T(n)-X2 | <u>GGT GGT GGT GGT TGT GGT GGT GGT GG</u><br>T(n) CGA GTA GGT ACG GAT CTG CGT ATT<br>GCG AAC GAC TCG | 0.87                             | 47.5                   |
| AS1411-T(n)-X3 | <u>GGT GGT GGT GGT TGT GGT GGT GGT GG</u><br>T(n) CGA GTC GTT CGC AAT ACG GCT GTA<br>CGT ATG GTC TCG | 1.29                             | 48.6                   |

<sup>a</sup>Note: Anti-nucleolin aptamer (AS1411) sequences are underlined.

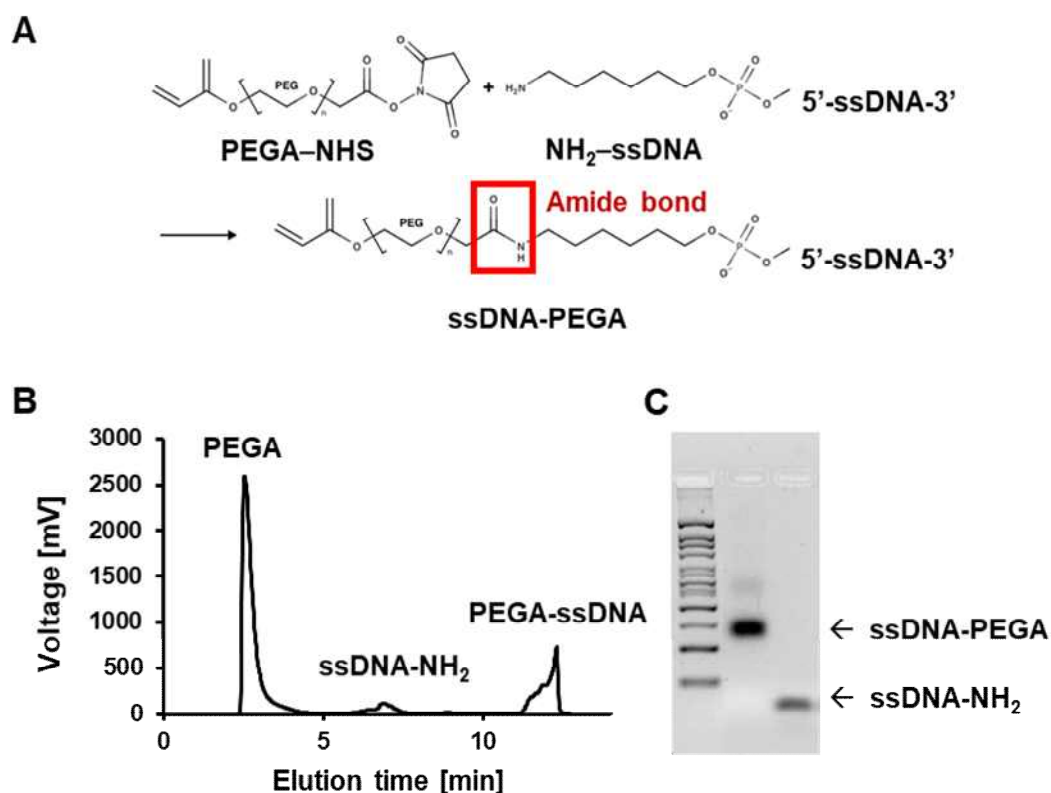

**Figure S1. Synthesis and purification of photo-crosslinkable ssDNA-PEGA.** (A) Schematic diagram of ssDNA-NH<sub>2</sub> pegylation via NHS ester reaction to form an amide bond. (B) HPLC chromatogram of PEGA-conjugated ssDNA and residual products. (C) Verification of the separation and purification of ssDNA-PEGA via gel electrophoresis. ssDNA-PEGA is represented in Lane 1 and ssDNA-NH<sub>2</sub> is represented in Lane 2.

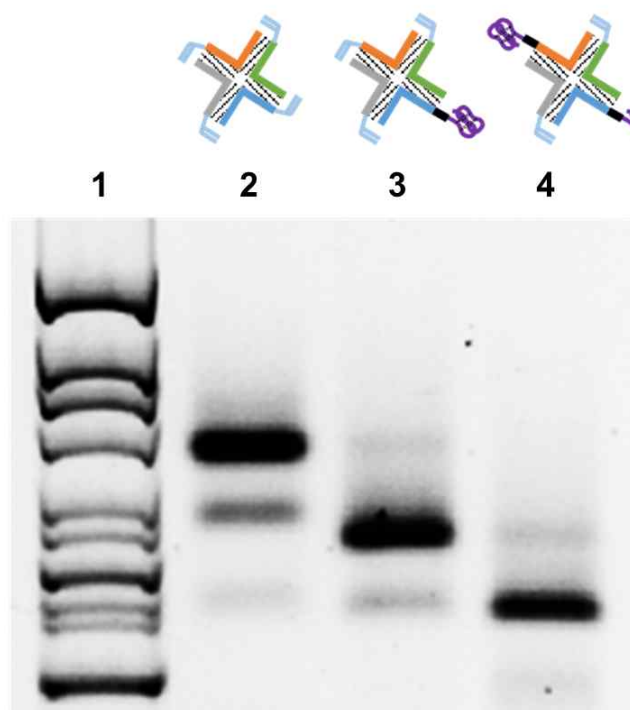

**Figure S2. Gel electrophoresis of aptamer-functionalized X-DNA.** Lane 1: ladder; lane 2: Apt-X (0); lane 3: Apt-X (1); lane 4: Apt-X (2).

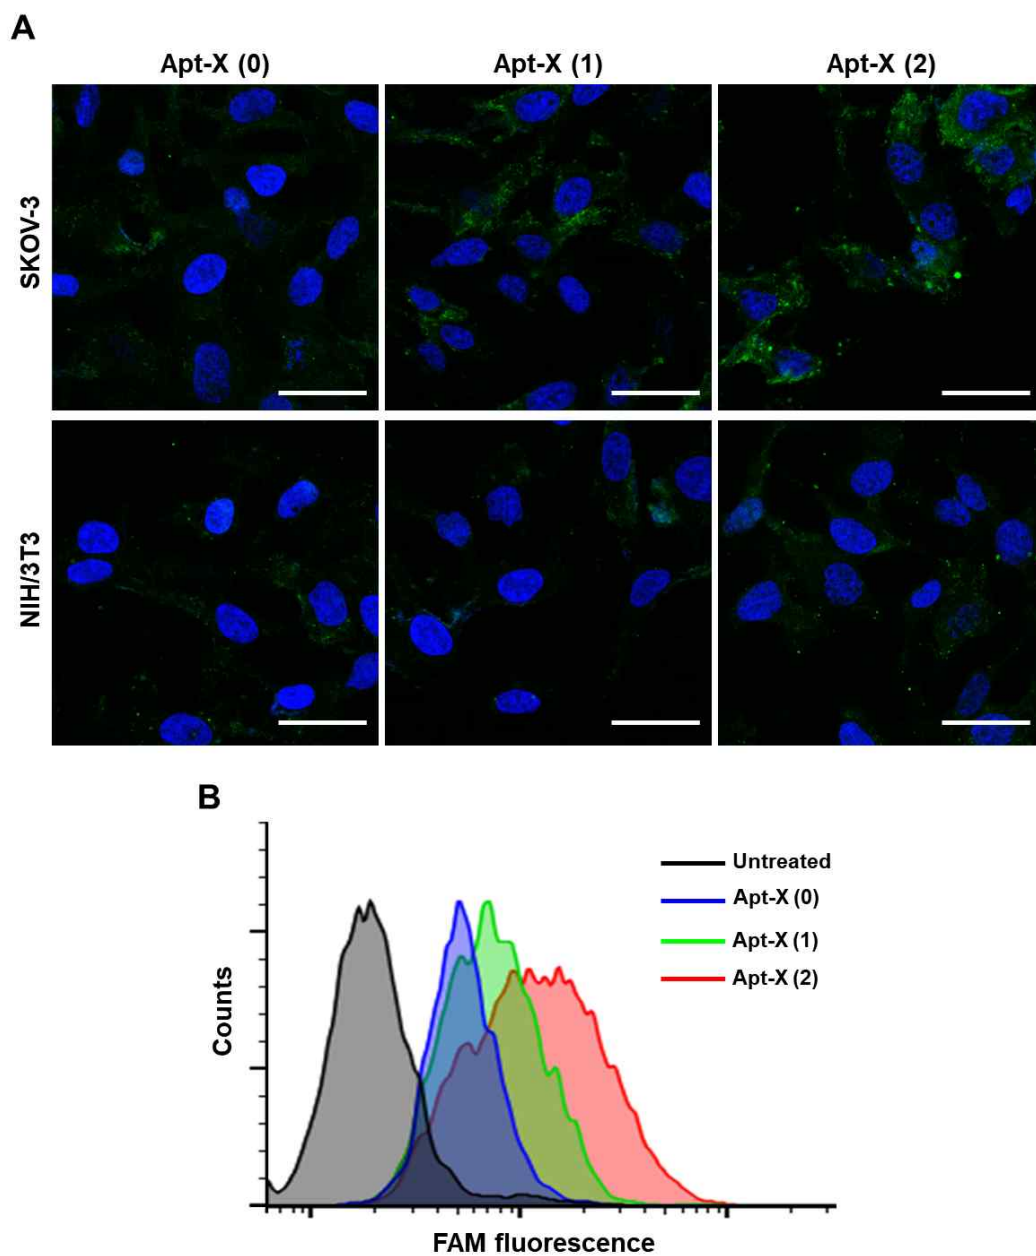

**Figure S3. Verification of aptamer number-dependent cell surface interaction of Apt-X -DNA nanostructures.** (A) CLSM and (B) Flow cytometry analysis of NIH/3T3 and SKOV-3 cells that were treated with FAM-labeled Apt-X (0), Apt-X (1), and Apt-X (2). Scale bar: 20  $\mu$ m.

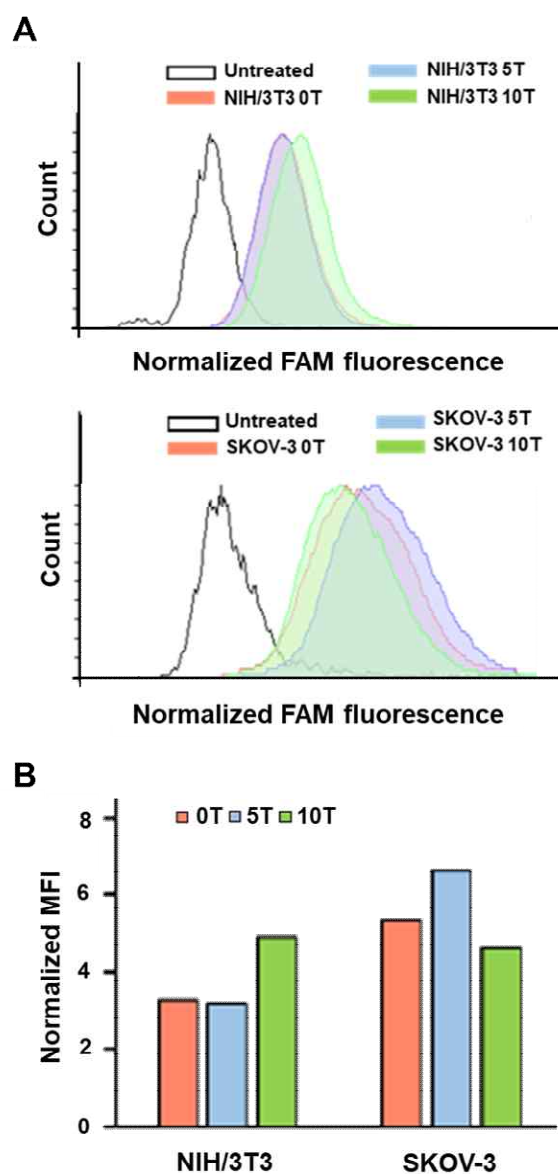

**Figure S4. Analysis of spacer number-dependent cellular interaction.** (A) Flow cytometry analysis and (B) normalized mean fluorescence intensity (MFI) of NIH/3T3 and SKOV-3 cells that were treated with FAM-labeled Apt-X (2) with 0, 5-, and 10-nucleotide-long spacer sequences.

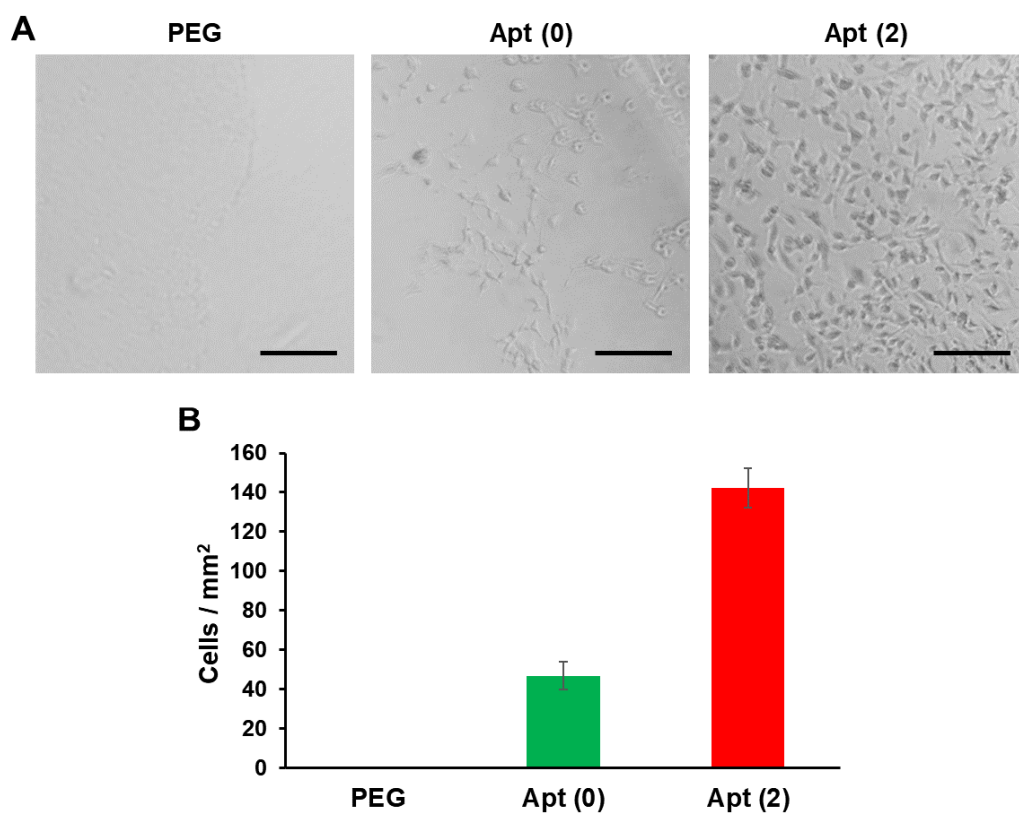

**Figure S5. Comparison of cell adhesion of DNA hybrid hydrogels.** (A) Contrast-enhanced light microscopy images and (B) quantification by ImageJ analysis of PEG, Apt (0), and Apt (2) hydrogels that were synthesized with 100 pmol of Apt-X-DNA and were incubated for 3 h in cell media with  $2.5 \times 10^4$  SKOV-3 cells. Scale bar: 0.2 mm.

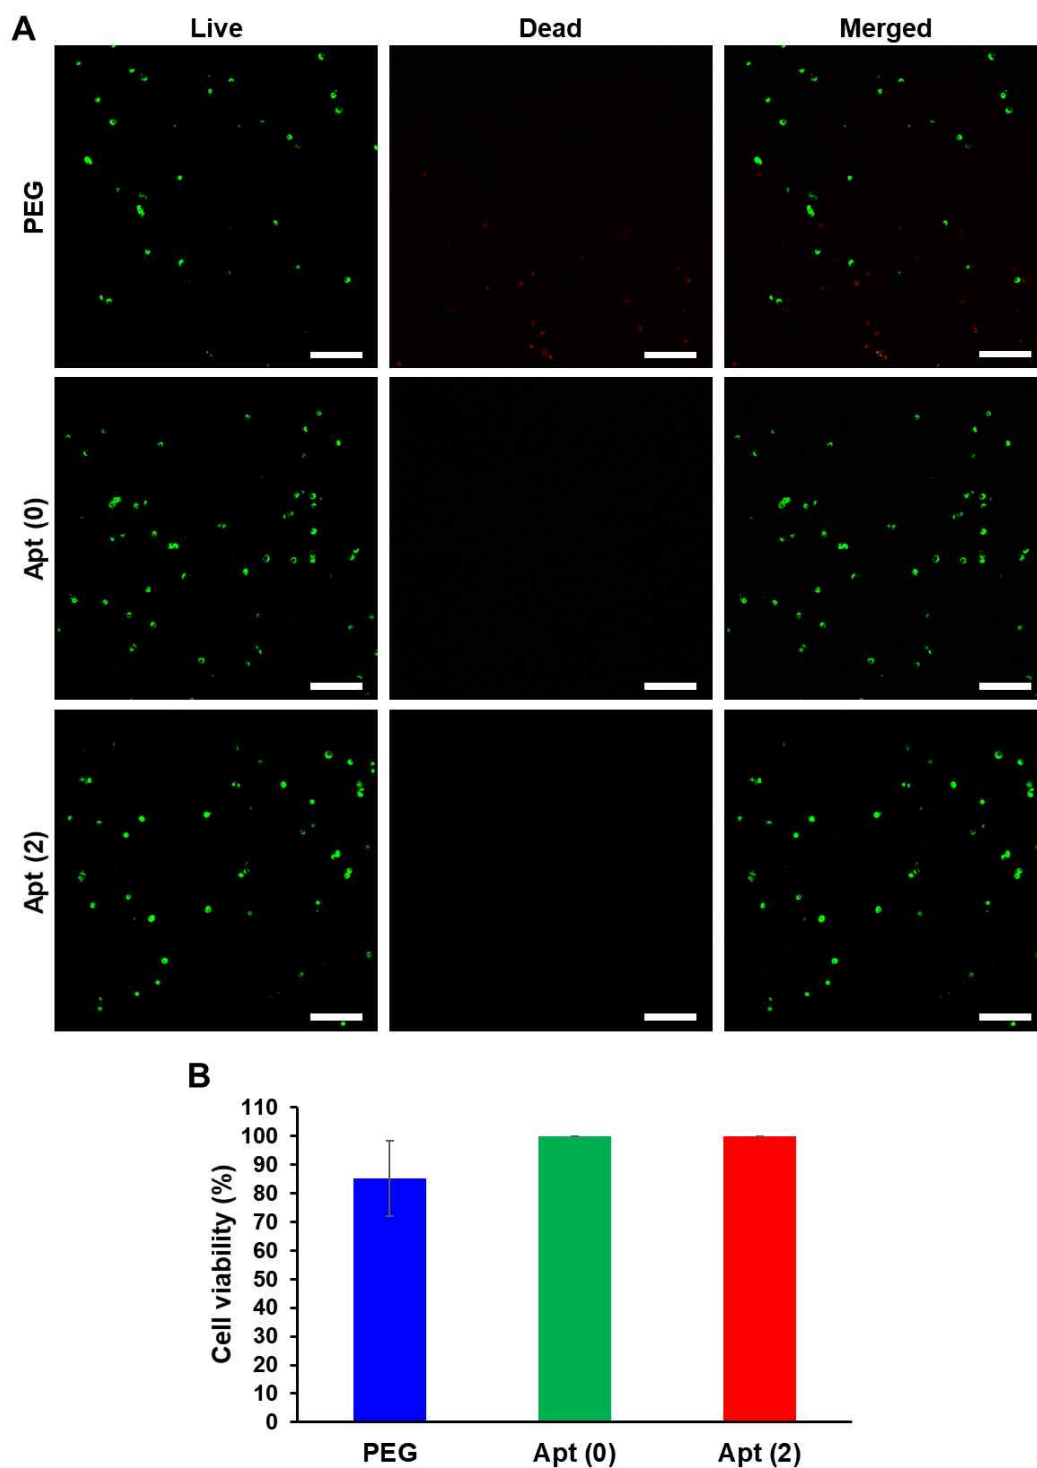

**Figure S6. Cytotoxicity evaluation of photo-crosslinking reaction.** (A) Live/dead assay of PEG, Apt (0), and Apt (2) hydrogels photo-polymerized with 100 pmol of Apt-X-DNA and  $1 \times 10^4$  SKOV-3 cells after 1 day of culture observed with confocal laser scanning microscopy. Scale bar: 10  $\mu$ m. (B) Quantitative analysis of CLSM images with ImageJ.

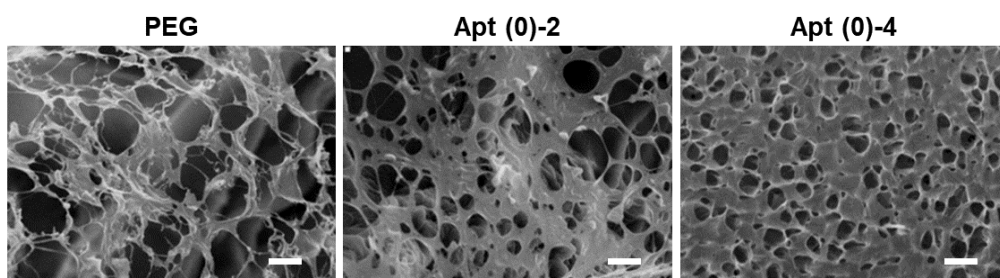

**Figure S7. Structural characterization of DNA hybrid hydrogels.** SEM analysis of hydrogels synthesized with 0, 2, and 4 nmol of Apt-X (0) to investigate the effect of varying the concentration of Apt-X-DNA nanostructure on porosity of the hydrogels. Scale bar: 10  $\mu\text{m}$ .

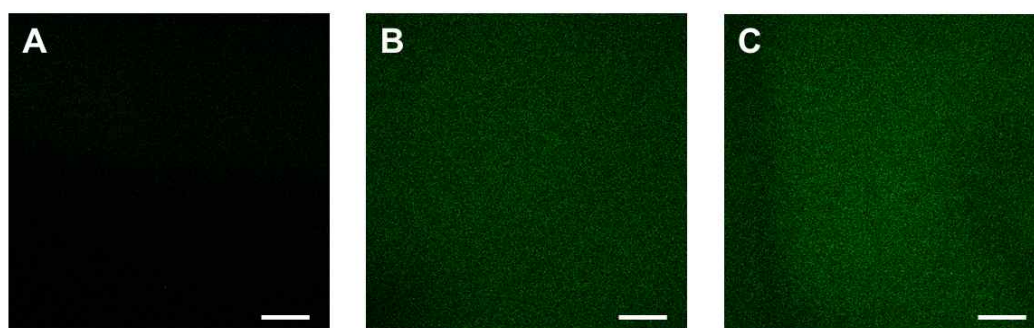

**Figure S8. Verification of the presence of DNA in hydrogels.** CLSM analysis of hydrogels photo-crosslinked with (A) 1 nmol, (B) 2 nmol, and (C) 4 nmol of SYBR-intercalated Apt-X (0). Scale bar: 20  $\mu\text{m}$ .

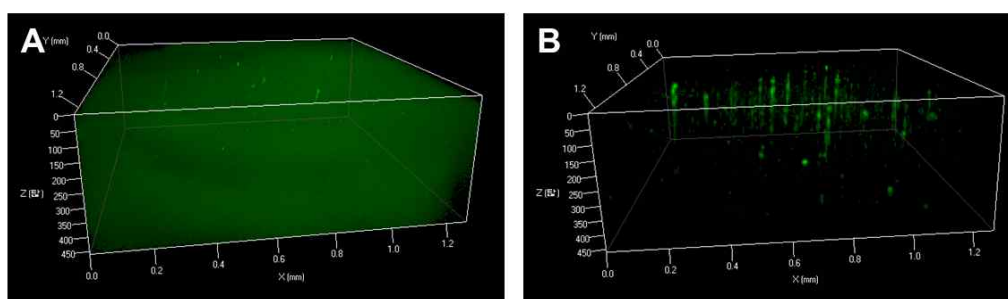

**Figure S9. Verification of the photo-polymerization of DNA in hydrogels.** CLSM analysis of hydrogels photo-crosslinked with 100 pmol of SYBR-intercalated (A) Apt-X (0) and (B) blunt X-DNA.

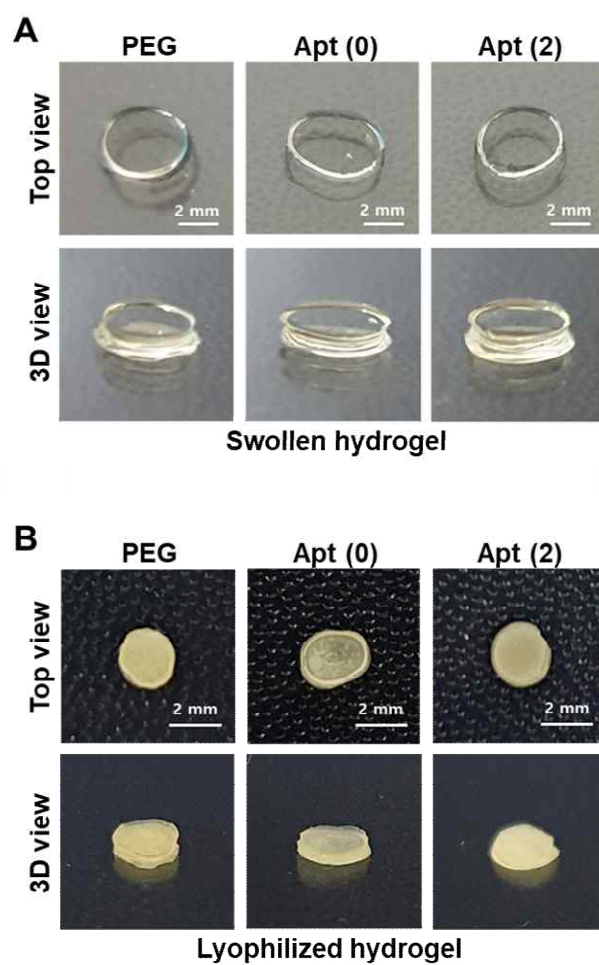

**Figure S10. Confirmation of photo-polymerization of DNA hybrid hydrogels.** Digital images of (A) swollen and (B) lyophilized DNA hybrid hydrogels.



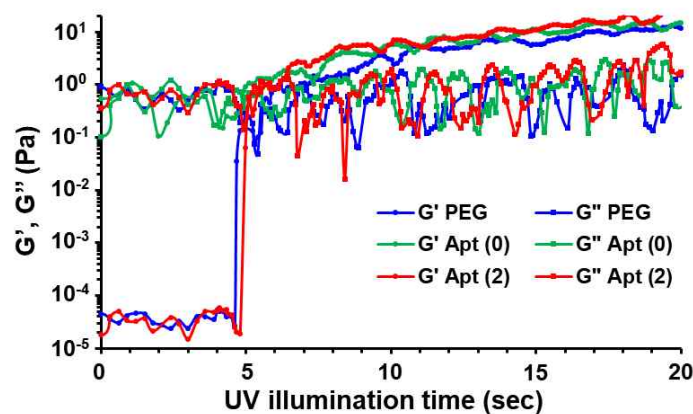

**Figure S11. Comparison of the gelation rate of DNA hybrid hydrogels.** Change in storage ( $G'$ ) and loss ( $G''$ ) modulus of PEG, Apt (0), and Apt (2) hydrogel precursor solutions over time upon illumination of UV wavelength of 365 nm.

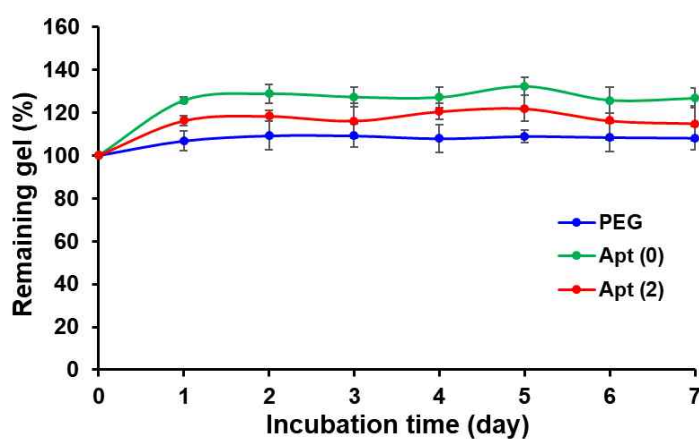

**Figure S12. Degradation profiles of DNA hybrid hydrogels.** PEG, Apt (0), and Apt (2) hydrogels were incubated in cell culture media for seven days. ‘Remaining gel %’ refers to the percentage change in mass remaining from the starting gels. The error bars represent standard deviation of at least three replicates.

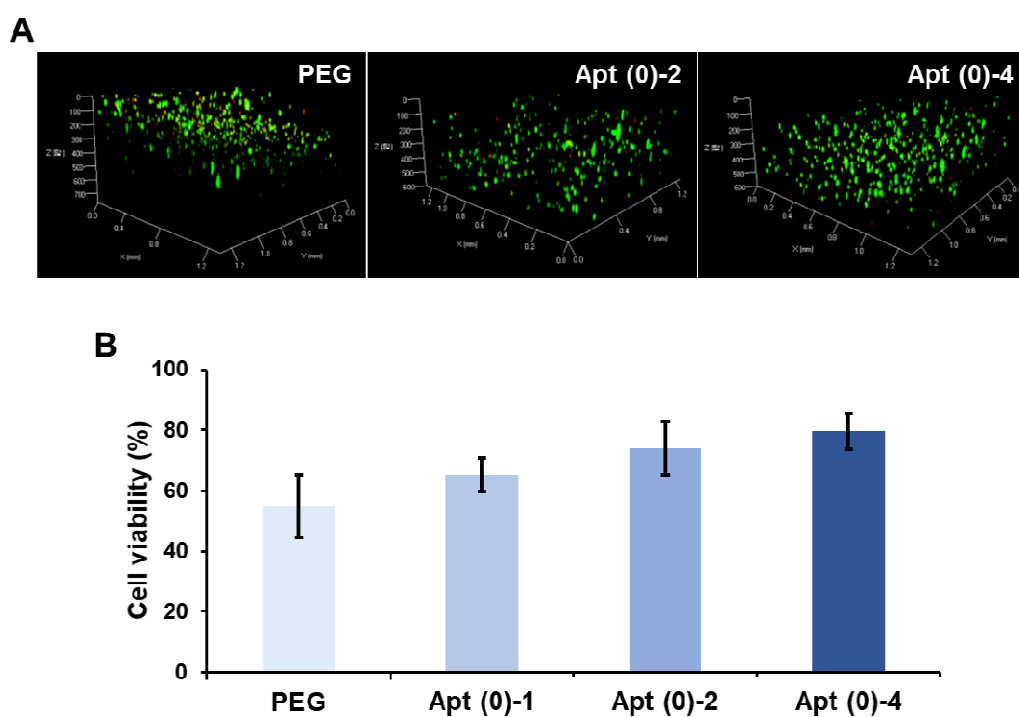

**Figure S13. Effect of Apt-X-DNA nanostructure concentration on cell viability.** (A) Live/dead 3D representations and (B) cell viability calculated by ImageJ analysis of PEG, Apt (0)-2, and Apt (0)-4 hydrogels after culturing  $3 \times 10^3$  SKOV-3 cells for seven days.
